# Supplementary material
Source: publisher figshare collection journal article supplement (https://frontiersin.figshare.com/ndownloader/files/18002675)
Supplement: Supplementary file [file 18002675]

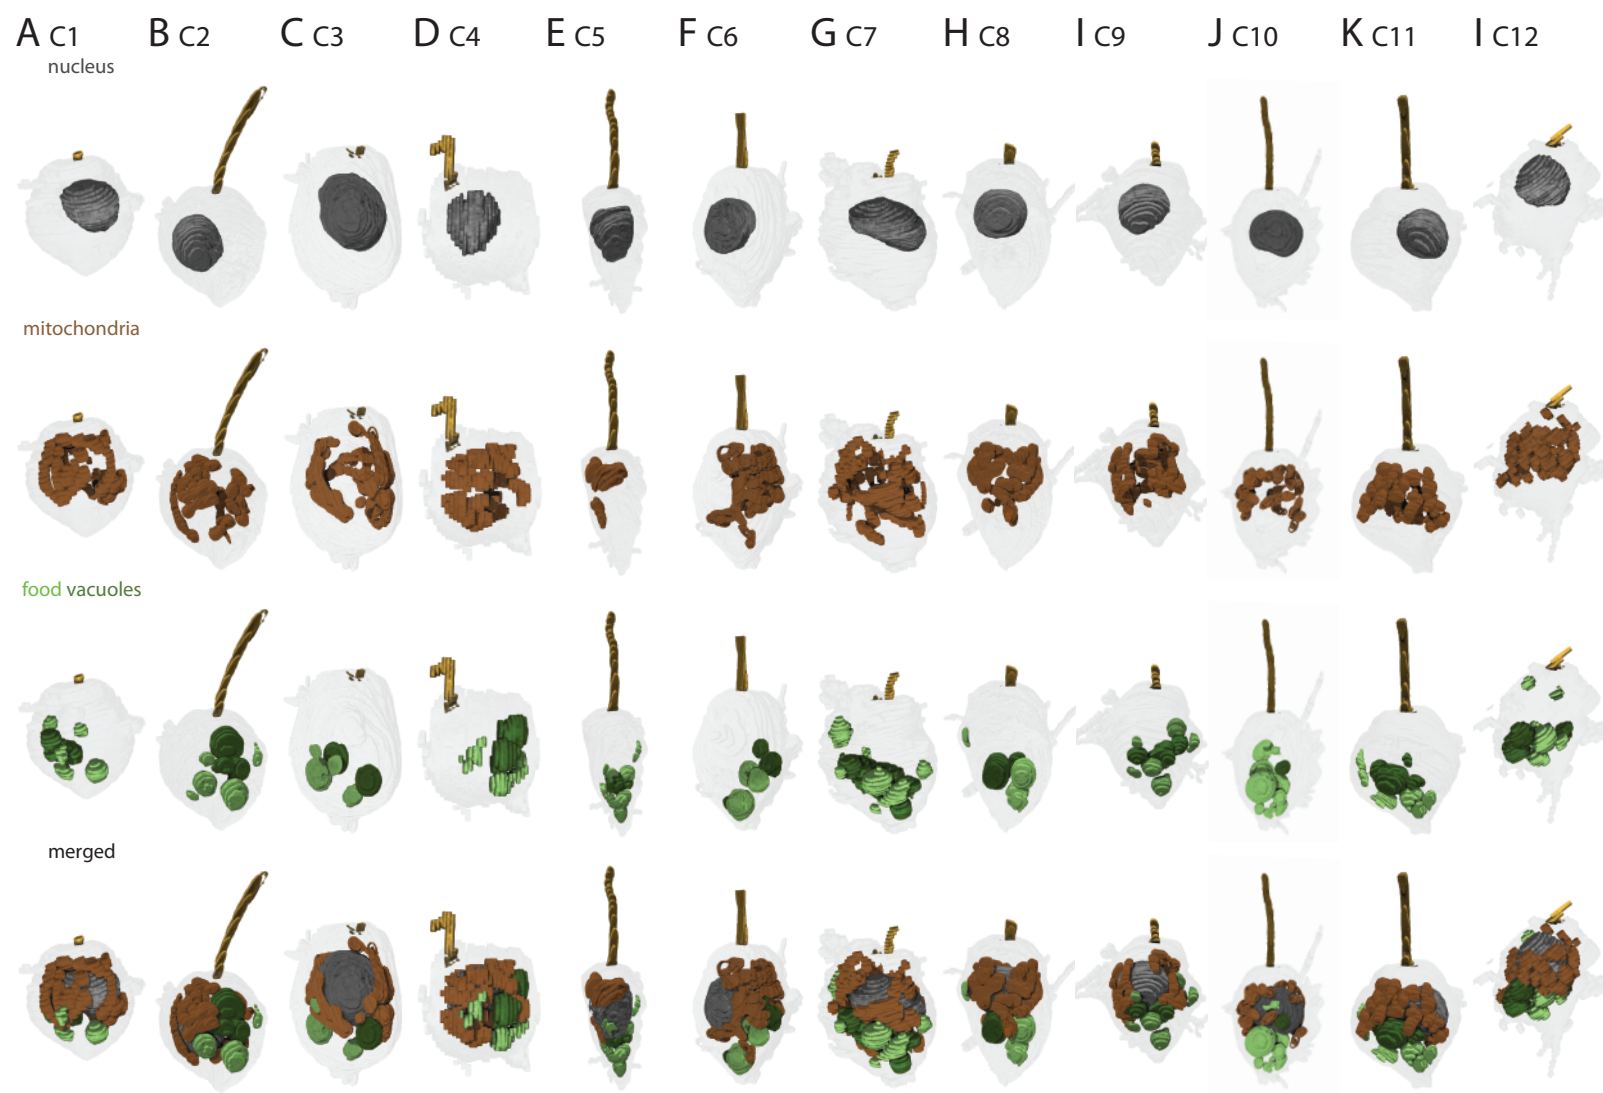

Suppl. Figure 8
